# Supplementary material for: Zebrafish Prickle1b mediates facial branchiomotor neuron migration via a farnesylation-dependent nuclear activity
Source: Oxford University Press journal article supplement (doi:10.1242/dev.060442), 2011-04-26
Supplement: dev060442tables1.pdf [file dev060442tables1.pdf]

| <b>Table S1. Primers</b>                                                                         |                                                        |
|--------------------------------------------------------------------------------------------------|--------------------------------------------------------|
| Construct                                                                                        | Primers (5' to 3')                                     |
| Venus-Pk1b $\Delta$ CaaX<br>(deletion of amino acids<br>869-872)                                 | AAGGTCACAAGGGCAAGAAGTCTAGAACTATAGTGAG                  |
|                                                                                                  | CTCACTATAGTTCTAGACTAGTCTTGCCCTTGACCTT                  |
| Venus-Pk1b $\Delta$ NLS (three-<br>step deletion of amino<br>acids 652-658, 721-725,<br>859-862) | ACCATCTCCTCTGAATCTTTCACAATCTCAGCCGC                    |
|                                                                                                  | GCGGCTGAGATTGTGAAAGATTCAGAGGAGATGGT                    |
|                                                                                                  | CTGCTAACAGACATCACAGTCGGAAAACGCGTTC                     |
|                                                                                                  | GAACGCGTTTTCCGACTGTGATGTCTGTTAGCAG                     |
|                                                                                                  | CTTTTGGCTCAAGGACCAAAGGTCACAAGGGCAA                     |
| TTGCCCTTGACCTTTGGTCCTTGAGCCAAAAG                                                                 |                                                        |
| Venus-Pk1b-R125Q<br>(mutation of amino acid<br>125, R to Q)                                      | ACTCCACATGTTGAGCATGCAACAGAAGAAAGAGGCACCTGGGAGG         |
|                                                                                                  | CCTCCCAAGTGCCTCTTTCTTCTGTTGCATGCTGAACATGTGGAGT         |
| mCherry-zhREST4 (deletion<br>of amino acids 316-854;<br>addition of ECDLVG from<br>mouse REST4)  | ACATGCGAACGCATTGAGACGCAACCGAACTGG                      |
|                                                                                                  | CCAGTTCGGTTGCGTCTGAATGCGTTCGCATGT                      |
|                                                                                                  | ACATGCGAACGCATTGAGAGTGTGATCTAGTTGGGTGAGACGCAACCGAACTGG |
|                                                                                                  | CCAGTTCGGTTGCGTCTCACCCAAGTATCACAATCTGAATGCGTTCGCATGT   |
